# Supplementary material for: Severity of chronic Lyme disease compared to other chronic conditions: a quality of life survey
Source: PeerJ. 2014 Mar 27;2:e322. doi: 10.7717/peerj.322 (PMC3976119; doi:10.7717/peerj.322)
Supplement: Supplemental Information 1 [file peerj-02-322-s001.xlsx]

## Sheet: Patient Selection and Character
	Inclusion Criteria (3,090 included for analysis out of 5,357 that took the survey)
	5357	Number of people that took the survey
	5278	Nonduplicate entries
	5057	Answered yes to the four consent questions (Q. 1): "I have read and understand the above information," "I voluntarily agree to participate," "I am at least 18 years of age," and "I currently reside in the United States"
	4529	Answered yes to Q. 2: Have you ever been told by a physician or other health professional that you have Lyme disease?
	3246	Diagnosis was confirmed by presence of EM rash or with supporting lab tests
				Q. 8: I had an EM rash	195
				Q. 9: I was CDC positive by two-tiered testing (ELISA or IFA follo	918
				Q: 9: I was CDC positive by Western Blot, but not two-tiered testi	727
				Q. 9: I was positive by ELISA or IFA, but not two-tiered testing	152	* if this was their only supporting lab test, they were not included
				Q. 9: I was positive by Western Blot but not CDC positive	1182
				Q. 9: I was PCR positive	286
				Q. 9: I was culture positive	267
				Q. 9: I had a positive spinal tap	110
	3090	Answered yes to Q. 3: Do you have persisting symptoms (6 months or more) after receiving at least 21 days of antibiotic treatment for Lyme disease?
	Demographic Data
	Q. 48: Gender
			Frequency	Percent	Answered Percent	Cumulative Percent
	Answered	Male	497	16.1	17.4	17.4
		Female	2364	76.5	82.6	100
		Total	2861	92.6	100
	Did not answer		229	7.4
	Total		3090	100
	Q. 49: Years of age as of date survey completed:
			Frequency	Percent	Answered Percent	Cumulative Percent
	Answered	18	22	0.7	0.8	0.8
		19	12	0.4	0.4	1.2
		20	19	0.6	0.7	1.9
		21	21	0.7	0.7	2.6
		22	18	0.6	0.6	3.2
		23	18	0.6	0.6	3.8
		24	26	0.8	0.9	4.8
		25	26	0.8	0.9	5.7
		26	23	0.7	0.8	6.5
		27	33	1.1	1.2	7.6
		28	30	1	1	8.7
		29	28	0.9	1	9.6
		30	39	1.3	1.4	11
		31	35	1.1	1.2	12.2
		32	42	1.4	1.5	13.7
		33	34	1.1	1.2	14.9
		34	41	1.3	1.4	16.3
		35	56	1.8	2	18.3
		36	41	1.3	1.4	19.7
		37	41	1.3	1.4	21.1
		38	45	1.5	1.6	22.7
		39	51	1.7	1.8	24.5
		40	53	1.7	1.9	26.3
		41	80	2.6	2.8	29.1
		42	75	2.4	2.6	31.7
		43	58	1.9	2	33.8
		44	81	2.6	2.8	36.6
		45	64	2.1	2.2	38.8
		46	72	2.3	2.5	41.4
		47	66	2.1	2.3	43.7
		48	72	2.3	2.5	46.2
		49	94	3	3.3	49.5
		50	87	2.8	3	52.5
		51	71	2.3	2.5	55
		52	111	3.6	3.9	58.9
		53	134	4.3	4.7	63.5
		54	77	2.5	2.7	66.2
		55	83	2.7	2.9	69.1
		56	98	3.2	3.4	72.5
		57	90	2.9	3.1	75.7
		58	87	2.8	3	78.7
		59	63	2	2.2	80.9
		60	66	2.1	2.3	83.2
		61	85	2.8	3	86.2
		62	52	1.7	1.8	88
		63	45	1.5	1.6	89.6
		64	43	1.4	1.5	91.1
		65	47	1.5	1.6	92.7
		66	36	1.2	1.3	94
		67	24	0.8	0.8	94.8
		68	32	1	1.1	95.9
		69	25	0.8	0.9	96.8
		70	15	0.5	0.5	97.3
		71	11	0.4	0.4	97.7
		72	12	0.4	0.4	98.1
		73	10	0.3	0.3	98.5
		74	8	0.3	0.3	98.8
		75	6	0.2	0.2	99
		76	4	0.1	0.1	99.1
		77	6	0.2	0.2	99.3
		78	7	0.2	0.2	99.6
		79	4	0.1	0.1	99.7
		80	1	0	0	99.8
		81	3	0.1	0.1	99.9
		82	1	0	0	99.9
		83	1	0	0	99.9
		84	1	0	0	100
		86	1	0	0	100
		Total	2863	92.7	100
	Did not answer		227	7.3
	Total		3090	100
	Q. 50: State:
			Frequency	Percent	Answered Percent	Cumulative Percent
	Answered		247	8	8	8
		AK	3	0.1	0.1	8.1
		AL	8	0.3	0.3	8.3
		AR	15	0.5	0.5	8.8
		AZ	52	1.7	1.7	10.5
		CA	481	15.6	15.6	26.1
		CO	42	1.4	1.4	27.4
		CT	105	3.4	3.4	30.8
		DC	1	0	0	30.9
		DE	10	0.3	0.3	31.2
		FL	85	2.8	2.8	33.9
		GA	47	1.5	1.5	35.5
		HI	6	0.2	0.2	35.7
		IA	28	0.9	0.9	36.6
		ID	8	0.3	0.3	36.8
		IL	59	1.9	1.9	38.7
		IN	22	0.7	0.7	39.4
		KS	37	1.2	1.2	40.6
		KY	13	0.4	0.4	41.1
		LA	5	0.2	0.2	41.2
		MA	170	5.5	5.5	46.7
		MD	122	3.9	3.9	50.7
		ME	47	1.5	1.5	52.2
		MI	41	1.3	1.3	53.5
		MN	60	1.9	1.9	55.5
		MO	26	0.8	0.8	56.3
		MP	1	0	0	56.3
		MS	5	0.2	0.2	56.5
		MT	12	0.4	0.4	56.9
		NC	58	1.9	1.9	58.8
		ND	2	0.1	0.1	58.8
		NE	1	0	0	58.9
		NH	85	2.8	2.8	61.6
		NJ	113	3.7	3.7	65.3
		NM	18	0.6	0.6	65.9
		NV	15	0.5	0.5	66.3
		NY	203	6.6	6.6	72.9
		OH	28	0.9	0.9	73.8
		OK	10	0.3	0.3	74.1
		OR	73	2.4	2.4	76.5
		PA	206	6.7	6.7	83.2
		PW	1	0	0	83.2
		RI	28	0.9	0.9	84.1
		SC	12	0.4	0.4	84.5
		SD	3	0.1	0.1	84.6
		TN	34	1.1	1.1	85.7
		TX	90	2.9	2.9	88.6
		UT	11	0.4	0.4	89
		VA	152	4.9	4.9	93.9
		VI	1	0	0	93.9
		VT	25	0.8	0.8	94.7
		WA	72	2.3	2.3	97.1
		WI	74	2.4	2.4	99.4
		WV	16	0.5	0.5	100
		WY	1	0	0	100
		Total	3090	100	100
	Q. 51: What is your highest level of education completed?
			Frequency	Percent	Answered Percent	Cumulative Percent
	Answered	High school or less	256	8.3	8.9	8.9
		Some college	751	24.3	26.2	35.2
		College graduate	1134	36.7	39.6	74.8
		Graduate school degree	723	23.4	25.2	100
		Total	2864	92.7	100
	Did not answer		226	7.3
	Total		3090	100
	Q. 52: Please estimate your total family income (pre-tax).
			Frequency	Percent	Answered Percent	Cumulative Percent
	Answered	<$20,000	383	12.4	13.8	13.8
		$20,000-<$40,000	393	12.7	14.1	27.9
		$40,000-<$60,000	440	14.2	15.8	43.7
		$60,000-<$80,000	396	12.8	14.2	58
		$80,000-<$100,000	383	12.4	13.8	71.8
		$100,000+	785	25.4	28.2	100
		Total	2780	90	100
	Did not answer		310	10
	Total		3090	100
	Diagnostic Data
	Q. 4: - How long was it from the onset of your symptoms until you were diagnosed with Lyme Disease? I was diagnosed
			Frequency	Percent	Answered Percent	Cumulative Percent
	Answered	Within 1 month	230	7.4	7.5	7.5
		Within 3 months	194	6.3	6.3	13.8
		Within 6 months	242	7.8	7.9	21.6
		Within 2 years	510	16.5	16.6	38.2
		More than 2 years	1904	61.6	61.8	100
		Total	3080	99.7	100
	Did not answer		10	0.3
	Total		3090	100
	Q. 5: How long have you had Lyme disease? I've had Lyme
			Frequency	Percent	Answered Percent	Cumulative Percent
	Answered	Less than 1 year	81	2.6	2.6	2.6
		Less than 2 years	164	5.3	5.3	8
		Less than 5 years	580	18.8	18.8	26.8
		Less than 10 years	698	22.6	22.7	49.5
		More than 10 years	1554	50.3	50.5	100
		Total	3077	99.6	100
	Did not answer		13	0.4
	Total		3090	100
	Q. 6: Do you recall being bitten by a tick prior to the onset of your symptoms?
			Frequency	Percent	Answered Percent	Cumulative Percent
	Answered	Yes	1219	39.4	39.6	39.6
		No	1609	52.1	52.3	91.8
		I'm not sure	251	8.1	8.2	100
		Total	3079	99.6	100
	Did not answer		11	0.4
	Total		3090	100
	Q. 7: Tell us about any rash you may have had when you contracted Lyme disease.
			Frequency	Percent	Answered Percent	Cumulative Percent
	Answered	I had no rash	1413	45.7	45.9	45.9
		I had a classic bull's eye rash	588	19	19.1	64.9
		I had an irregular rash	625	20.2	20.3	85.2
		I don't know	455	14.7	14.8	100
		Total	3081	99.7	100
	Did not answer		9	0.3
	Total		3090	100
	Q. 8: How were you diagnosed? [Check all that apply.]
			Frequency	Percent	Answered Percent	Cumulative Percent
	Answered	I had an EM rash	195	6.3	6.3	6.3
		I was clinically diagnosed with supporting lab tests	2895	93.7	93.7	100
		I was clinically diagnosed without an EM rash or supporting lab tests	0	0	0	100
		I don't know	0	0	0	100
		Total	3090	100	100
	Q. 9: If your diagnosis was based on positive diagnostic tests, please specify which diagnostic tests were positive. [Choose all that apply]
			Frequency	Percent
	Answered	Not applicable	98	3.2
		I was CDC positive by two-tiered testing (ELISA or IFA follo	918	29.7
		I was CDC positive by Western Blot, but not two-tiered testi	727	23.5
		I was positive by ELISA or IFA, but not two-tiered testing	152	4.9
		I was positive by Western Blot but not CDC positive	1182	38.3
		I was PCR positive	286	9.3
		I was culture positive	267	8.6
		I had a positive spinal tap	110	3.6
	Did not answer		0	0
	Q. 10: Tell us whether you have been diagnosed with any of the following tick-borne disease or co-infections and the basis of the diagnosis
			No/I don’t know	Yes, with supporting lab test	Yes, without supporting lab test	Total
		Bartonella	1117	875	796	2788
		Percent of full sample	0.361489	0.283172	0.257605
		Ehrlichia	1724	449	179	2352
		Percent of full sample	0.557929	0.145307	0.0579288
		Babesia	1097	997	736	2830
		Percent of full sample	0.355016	0.322654	0.238188
		Anaplasma	1909	149	48	2106
		Percent of full sample	0.617799	0.0482201	0.015534
		Mycoplasma	1684	468	129	2281
		Percent of full sample	0.544984	0.151456	0.0417476
		Rocky Mountain Spotted Fever	1918	174	52	2144
		Percent of full sample	0.620712	0.0563107	0.0168285
		Tularemia	2019	26	14	2059
		Percent of full sample	0.653398	0.00841424	0.00453074
	Co-infection_Count
			Frequency	Percent	Valid Percent	Cumulative Percent
	Answered Yes	1	728	23.6	44.2	44.2
		2	512	16.6	31.1	75.3
		3	265	8.6	16.1	91.4
		4	91	2.9	5.5	97
		5	37	1.2	2.2	99.2
		6	5	0.2	0.3	99.5
		7	8	0.3	0.5	100
		Total	1646	53.3	100
	Did Not Answer		1444	46.7
	Total		3090	100
	Antibiotics Usage
	Q. 21: What is your current status in terms of antibiotic treatment for your Lyme disease?
			Frequency	Percent	Answered Percent	Cumulative Percent
	Answered	I am taking oral antibiotics	1180	38.2	40.2	40.2
		I am taking intravenous (IV) antibiotics	61	2	2.1	42.3
		I am taking intramuscular (IM) antibiotics (shots)	50	1.6	1.7	44
		I am taking both oral and intravenous (IV) antibiotics	125	4	4.3	48.2
		I am not taking antibiotics	1521	49.2	51.8	100
		Total	2937	95	100
	Did not answer		153	5
	Total		3090	100
	Q. 22: If you are not being treated currently with antibiotics, please select your PRIMARY reason for not doing so.
			Frequency	Percent	Answered Percent	Cumulative Percent
	Answered	Not applicable	993	32.1	39.7	39.7
		Financial or insurance constraints	202	6.5	8.1	47.8
		Treatment side effects	186	6	7.4	55.3
		Currently in remission or well	266	8.6	10.6	65.9
		Not helping any longer	192	6.2	7.7	73.6
		No access to doctors who treat	200	6.5	8	81.6
		Being treated with other methods	460	14.9	18.4	100
		Total	2499	80.9	100
	Did not answer		591	19.1
	Total		3090	100

## Sheet: Results
	CDC HRQoL Module (General Health, Healthy Days, Activity Days)
	Q. 11: Would you say that in general your current health is:
			Frequency	Percent	Answered Percent	Cumulative Percent
	Answered	Excellent	33	1.1	1.1	1.1
		Very good	206	6.7	6.8	7.9
		Good	599	19.4	19.8	27.7
		Fair	1137	36.8	37.6	65.4
		Poor	1046	33.9	34.6	100
		Total	3021	97.8	100
	Did not answer		69	2.2
	Total		3090	100
	Crosstabulation: fair or poor health status by How long have you had Lyme disease?
				How long have you had Lyme disease? I've had Lyme						Total
				Less than 6 months	Less than 1 year	Less than 2 years	Less than 5 years	Less than 10 years	More than 10 years
	fair_poor	0	Count	60	34	58	208	190	346	836
			% within fair_poor	0.043	0.041	0.069	0.249	0.227	0.414	1
			% within How long have you had Lyme disease? I've had Lyme	0.769	0.442	0.367	0.37	0.279	0.226	0.278
		1	Count	18	43	100	354	491	1185	2173
			% within fair_poor	0.005	0.02	0.046	0.163	0.226	0.545	1
			% within How long have you had Lyme disease? I've had Lyme	0.231	0.558	0.633	0.63	0.721	0.774	0.722
	Total		Count	78	77	158	562	681	1531	3009
			% within fair_poor	0.017	0.026	0.053	0.187	0.226	0.509	1
			% within How long have you had Lyme disease? I've had Lyme	1	1	1	1	1	1	1
	* The "Less than 6 months" data that is enclosed is taken from the unflitered sample (as one of the inclusion criteria is continued sickness at least 6 months after treatment.
	The rest of the data in the table above is taken from the sample filtered by the inclusion criteria.
	Q. 13: During the PAST 30 DAYS, for about how many days have you felt SAD, BLUE or DEPRESSED?							*For the following questions, answers longer than 30 were capped at 30.
			Frequency	Percent	Answered Percent	Cumulative Percent
	Answered	0	387	12.5	13	13
		1	80	2.6	2.7	15.7
		2	180	5.8	6	21.7
		3	152	4.9	5.1	26.8
		4	85	2.8	2.9	29.7
		5	331	10.7	11.1	40.8
		6	24	0.8	0.8	41.6
		7	69	2.2	2.3	43.9
		8	41	1.3	1.4	45.3
		9	4	0.1	0.1	45.4
		10	317	10.3	10.6	56.1
		11	4	0.1	0.1	56.2
		12	31	1	1	57.2
		13	2	0.1	0.1	57.3
		14	22	0.7	0.7	58
		15	263	8.5	8.8	66.9
		16	7	0.2	0.2	67.1
		17	9	0.3	0.3	67.4
		18	16	0.5	0.5	67.9
		19	1	0	0	68
		20	294	9.5	9.9	77.8
		21	9	0.3	0.3	78.1
		22	6	0.2	0.2	78.3
		23	3	0.1	0.1	78.4
		24	5	0.2	0.2	78.6
		25	140	4.5	4.7	83.3
		26	3	0.1	0.1	83.4
		27	10	0.3	0.3	83.8
		28	45	1.5	1.5	85.3
		29	27	0.9	0.9	86.2
		30	412	13.3	13.8	100
		Total	2979	96.4	100
	Did not answer		111	3.6
	Total		3090	100
	Q. 14: During the PAST 30 DAYS, for about how many days have you felt WORRIED, TENSE, or ANXIOUS
			Frequency	Percent	Answered Percent	Cumulative Percent
	Answered	0	258	8.3	8.7	8.7
		1	54	1.7	1.8	10.5
		2	119	3.9	4	14.5
		3	108	3.5	3.6	18.1
		4	71	2.3	2.4	20.5
		5	271	8.8	9.1	29.5
		6	36	1.2	1.2	30.8
		7	53	1.7	1.8	32.5
		8	34	1.1	1.1	33.7
		9	9	0.3	0.3	34
		10	288	9.3	9.7	43.6
		11	1	0	0	43.7
		12	28	0.9	0.9	44.6
		13	3	0.1	0.1	44.7
		14	26	0.8	0.9	45.6
		15	255	8.3	8.6	54.1
		16	5	0.2	0.2	54.3
		17	1	0	0	54.3
		18	11	0.4	0.4	54.7
		19	5	0.2	0.2	54.9
		20	292	9.4	9.8	64.7
		21	11	0.4	0.4	65
		22	8	0.3	0.3	65.3
		23	4	0.1	0.1	65.4
		24	5	0.2	0.2	65.6
		25	195	6.3	6.5	72.1
		26	8	0.3	0.3	72.4
		27	4	0.1	0.1	72.5
		28	42	1.4	1.4	73.9
		29	14	0.5	0.5	74.4
		30	763	24.7	25.6	100
		Total	2982	96.5	100
	Did not answer		108	3.5
	Total		3090	100
	Q. 15: During the PAST 30 DAYS, for about how many days have you felt you did NOT get ENOUGH REST or SLEEP?
			Frequency	Percent	Answered Percent	Cumulative Percent
	Answered	0	121	3.9	4.1	4.1
		1	14	0.5	0.5	4.5
		2	46	1.5	1.5	6.1
		3	59	1.9	2	8
		4	34	1.1	1.1	9.2
		5	152	4.9	5.1	14.3
		6	26	0.8	0.9	15.1
		7	47	1.5	1.6	16.7
		8	37	1.2	1.2	18
		9	4	0.1	0.1	18.1
		10	228	7.4	7.6	25.7
		11	3	0.1	0.1	25.8
		12	22	0.7	0.7	26.6
		13	1	0	0	26.6
		14	8	0.3	0.3	26.9
		15	251	8.1	8.4	35.3
		16	6	0.2	0.2	35.5
		17	4	0.1	0.1	35.6
		18	12	0.4	0.4	36
		19	3	0.1	0.1	36.1
		20	339	11	11.4	47.5
		21	12	0.4	0.4	47.9
		22	13	0.4	0.4	48.3
		23	5	0.2	0.2	48.5
		24	12	0.4	0.4	48.9
		25	269	8.7	9	57.9
		26	13	0.4	0.4	58.3
		27	23	0.7	0.8	59.1
		28	79	2.6	2.6	61.8
		29	40	1.3	1.3	63.1
		30	1101	35.6	36.9	100
		Total	2984	96.6	100
	Did not answer		106	3.4
	Total		3090	100
	Q. 16: During the PAST 30 DAYS, for about how many days have you felt VERY HEALTHY AND FULL OF ENERGY?
			Frequency	Percent	Answered Percent	Cumulative Percent
	Answered	0	1603	51.9	53.5	53.5
		1	142	4.6	4.7	58.2
		2	257	8.3	8.6	66.8
		3	119	3.9	4	70.8
		4	68	2.2	2.3	73
		5	282	9.1	9.4	82.4
		6	28	0.9	0.9	83.4
		7	48	1.6	1.6	85
		8	26	0.8	0.9	85.9
		9	4	0.1	0.1	86
		10	142	4.6	4.7	90.7
		12	17	0.6	0.6	91.3
		13	2	0.1	0.1	91.4
		14	5	0.2	0.2	91.5
		15	83	2.7	2.8	94.3
		16	3	0.1	0.1	94.4
		17	1	0	0	94.4
		18	4	0.1	0.1	94.6
		19	1	0	0	94.6
		20	65	2.1	2.2	96.8
		21	2	0.1	0.1	96.8
		22	1	0	0	96.9
		23	4	0.1	0.1	97
		24	5	0.2	0.2	97.2
		25	32	1	1.1	98.2
		26	5	0.2	0.2	98.4
		27	6	0.2	0.2	98.6
		28	13	0.4	0.4	99
		29	2	0.1	0.1	99.1
		30	27	0.9	0.9	100
		Total	2997	97	100
	Did not answer		93	3
	Total		3090	100
	Q. 17: Now thinking about your physical health, which includes physical illness and injury, for how many days during the PAST 30 DAYS was your physical health not good?
			Frequency	Percent	Answered Percent	Cumulative Percent
	Answered	0	148	4.8	5	5
		1	26	0.8	0.9	5.9
		2	55	1.8	1.9	7.8
		3	67	2.2	2.3	10.1
		4	34	1.1	1.2	11.2
		5	160	5.2	5.5	16.7
		6	22	0.7	0.7	17.4
		7	45	1.5	1.5	19
		8	19	0.6	0.6	19.6
		9	3	0.1	0.1	19.7
		10	195	6.3	6.6	26.4
		11	2	0.1	0.1	26.4
		12	42	1.4	1.4	27.9
		13	4	0.1	0.1	28
		14	22	0.7	0.7	28.8
		15	239	7.7	8.1	36.9
		16	6	0.2	0.2	37.1
		17	1	0	0	37.1
		18	25	0.8	0.9	38
		19	1	0	0	38
		20	273	8.8	9.3	47.3
		21	13	0.4	0.4	47.8
		22	14	0.5	0.5	48.2
		23	5	0.2	0.2	48.4
		24	12	0.4	0.4	48.8
		25	203	6.6	6.9	55.7
		26	16	0.5	0.5	56.3
		27	20	0.6	0.7	57
		28	90	2.9	3.1	60
		29	33	1.1	1.1	61.2
		30	1140	36.9	38.8	100
		Total	2935	95	100
	Did not answer		155	5
	Total		3090	100
	Q. 18: Now thinking about your mental health, which includes stress, depression, and problems with emotions, for how many days during the PAST 30 DAYS was your mental health not good?
			Frequency	Percent	Answered Percent	Cumulative Percent
	Answered	0	235	7.6	8	8
		1	52	1.7	1.8	9.8
		2	119	3.9	4.1	13.9
		3	121	3.9	4.1	18
		4	66	2.1	2.3	20.2
		5	275	8.9	9.4	29.6
		6	32	1	1.1	30.7
		7	50	1.6	1.7	32.4
		8	39	1.3	1.3	33.7
		9	5	0.2	0.2	33.9
		10	277	9	9.5	43.4
		11	1	0	0	43.4
		12	35	1.1	1.2	44.6
		13	4	0.1	0.1	44.7
		14	19	0.6	0.6	45.4
		15	289	9.4	9.9	55.2
		16	6	0.2	0.2	55.4
		17	4	0.1	0.1	55.6
		18	17	0.6	0.6	56.2
		19	3	0.1	0.1	56.3
		20	311	10.1	10.6	66.9
		21	11	0.4	0.4	67.2
		22	7	0.2	0.2	67.5
		23	3	0.1	0.1	67.6
		24	6	0.2	0.2	67.8
		25	189	6.1	6.4	74.2
		26	11	0.4	0.4	74.6
		27	15	0.5	0.5	75.1
		28	64	2.1	2.2	77.3
		29	20	0.6	0.7	78
		30	645	20.9	22	100
		Total	2931	94.9	100
	Did not answer		159	5.1
	Total		3090	100
	Q. 19: During the PAST 30 DAYS, for about how many days did poor physical or mental health keep you from doing your usual activities such as self-care, work or recreation?
			Frequency	Percent	Answered Percent	Cumulative Percent
	Answered	0	322	10.4	10.9	10.9
		1	37	1.2	1.3	12.2
		2	90	2.9	3.1	15.3
		3	75	2.4	2.5	17.8
		4	54	1.7	1.8	19.6
		5	210	6.8	7.1	26.8
		6	25	0.8	0.8	27.6
		7	36	1.2	1.2	28.9
		8	36	1.2	1.2	30.1
		9	9	0.3	0.3	30.4
		10	249	8.1	8.5	38.9
		12	25	0.8	0.8	39.7
		13	3	0.1	0.1	39.8
		14	23	0.7	0.8	40.6
		15	251	8.1	8.5	49.1
		16	8	0.3	0.3	49.4
		17	3	0.1	0.1	49.5
		18	22	0.7	0.7	50.2
		19	3	0.1	0.1	50.3
		20	277	9	9.4	59.8
		21	13	0.4	0.4	60.2
		22	9	0.3	0.3	60.5
		23	3	0.1	0.1	60.6
		24	8	0.3	0.3	60.9
		25	205	6.6	7	67.8
		26	15	0.5	0.5	68.4
		27	13	0.4	0.4	68.8
		28	68	2.2	2.3	71.1
		29	21	0.7	0.7	71.8
		30	829	26.8	28.2	100
		Total	2942	95.2	100
	Did not answer		148	4.8
	Total		3090	100
	Q. 20: During the PAST 30 DAYS, for about how many days did PAIN make it hard for you to do your usual activities, such as self-care, work or recreation?
			Frequency	Percent	Answered Percent	Cumulative Percent
	Answered	0	404	13.1	13.7	13.7
		1	52	1.7	1.8	15.5
		2	100	3.2	3.4	18.9
		3	74	2.4	2.5	21.4
		4	42	1.4	1.4	22.8
		5	215	7	7.3	30.1
		6	18	0.6	0.6	30.7
		7	41	1.3	1.4	32.1
		8	32	1	1.1	33.2
		9	3	0.1	0.1	33.3
		10	214	6.9	7.3	40.6
		11	1	0	0	40.6
		12	21	0.7	0.7	41.3
		13	5	0.2	0.2	41.5
		14	22	0.7	0.7	42.2
		15	217	7	7.4	49.6
		16	7	0.2	0.2	49.8
		17	6	0.2	0.2	50.1
		18	22	0.7	0.7	50.8
		19	2	0.1	0.1	50.9
		20	268	8.7	9.1	60
		21	7	0.2	0.2	60.2
		22	7	0.2	0.2	60.4
		23	7	0.2	0.2	60.7
		24	6	0.2	0.2	60.9
		25	177	5.7	6	66.9
		26	12	0.4	0.4	67.3
		27	10	0.3	0.3	67.6
		28	41	1.3	1.4	69
		29	15	0.5	0.5	69.5
		30	897	29	30.5	100
		Total	2945	95.3	100
	Did not answer		145	4.7
	Total		3090	100
	Comparison of repondents whose clinical diagnosis was based on EM rash or two-tiered serology against those whose clinical diagnosis was based on any of CDC positive Western Blot, non-CDC positive Western Blot, postive PCR, postive culture, and/or positive spinal tap.
	Q. 8,9: How were you diagnosed? If your diagnosis was based on positive diagnostic tests, please specify which diagnostic tests were positive. [choose all that apply]
			Frequency	Percent	Answered Percent	Cumulative Percent
	Answered	0	2003	64.8	64.8	64.8
		1	1087	35.2	35.2	100
		Total	3090	100	100
	Crosstabulation: (Q: 8,9 by Q: 4) Diagnosed by EM rash or two-tiered serology by How long was it from the onset of your symptoms until you were diagnosed with Lyme Disease?
				How long was it from the onset of your symptoms until you were diagnosed with Lyme disease?					Total
				Within 1 month	Within 3 months	Within 6 months	Within 2 years	More than 2 years
	Answered	Other laboratory data	Count	74	102	141	338	1341	1996
			% within em_rash_or_two_tiered	0.037	0.051	0.071	0.169	0.672	1
			% within How long was it from the onset of your symptoms until you were diagnosed with Lyme disease? I was diagnosed	0.322	0.526	0.583	0.663	0.704	0.648
			% of Total	0.024	0.033	0.046	0.11	0.435	0.648
		EM rash or two-tiered serology	Count	156	92	101	172	563	1084
			% within em_rash_or_two_tiered	0.144	0.085	0.093	0.159	0.519	1
			% within How long was it from the onset of your symptoms until you were diagnosed with Lyme disease? I was diagnosed	0.678	0.474	0.417	0.337	0.296	0.352
			% of Total	0.051	0.03	0.033	0.056	0.183	0.352
	Total		Count	230	194	242	510	1904	3080
			% within em_rash_or_two_tiered	0.075	0.063	0.079	0.166	0.618	1
			% within How long was it from the onset of your symptoms until you were diagnosed with Lyme disease? I was diagnosed	1	1	1	1	1	1
			% of Total	0.075	0.063	0.079	0.166	0.618	1
	Crosstabulation: (Q: 8,9 by Q: 11) Diagnosed by EM rash or two-tiered serology by Would you say that in general your current health is:
				Would you say that in general your current health is:					Total
				Excellent	Very good	Good	Fair	Poor
	Answered	Other laboratory data	Count	21	128	389	729	696	1963
			% within em_rash_or_two_tiered	0.011	0.065	0.198	0.371	0.355	1
			% within Would you say that in general your current health is:	0.636	0.621	0.649	0.641	0.665	0.65
			% of Total	0.007	0.042	0.129	0.241	0.23	0.65
		EM rash or two-tiered serology	Count	12	78	210	408	350	1058
			% within em_rash_or_two_tiered	0.011	0.074	0.198	0.386	0.331	1
			% within Would you say that in general your current health is:	0.364	0.379	0.351	0.359	0.335	0.35
			% of Total	0.004	0.026	0.07	0.135	0.116	0.35
	Total		Count	33	206	599	1137	1046	3021
			% within em_rash_or_two_tiered	0.011	0.068	0.198	0.376	0.346	1
			% within Would you say that in general your current health is:	1	1	1	1	1	1
			% of Total	0.011	0.068	0.198	0.376	0.346	1
	Crosstabulation: (Q: 8,9 by Q: 17) Diagnosed by EM rash or two-tiered serology by Number of poor physical health days
				Number of poor physical health days																															Total
				0	1	2	3	4	5	6	7	8	9	10	11	12	13	14	15	16	17	18	19	20	21	22	23	24	25	26	27	28	29	30
	Answered	Other laboratory data	Count	87	17	32	41	21	106	16	34	15	1	133	1	24	2	12	146	3	1	17	1	160	7	9	3	9	125	11	13	54	19	786	1906
			% within em_rash_or_two_tiered	0.046	0.009	0.017	0.022	0.011	0.056	0.008	0.018	0.008	0.001	0.07	0.001	0.013	0.001	0.006	0.077	0.002	0.001	0.009	0.001	0.084	0.004	0.005	0.002	0.005	0.066	0.006	0.007	0.028	0.01	0.412	1
			% within Number of poor physical health days	0.588	0.654	0.582	0.612	0.618	0.663	0.727	0.756	0.789	0.333	0.682	0.5	0.571	0.5	0.545	0.611	0.5	1	0.68	1	0.586	0.538	0.643	0.6	0.75	0.616	0.688	0.65	0.6	0.576	0.689	0.649
			% of Total	0.03	0.006	0.011	0.014	0.007	0.036	0.005	0.012	0.005	0	0.045	0	0.008	0.001	0.004	0.05	0.001	0	0.006	0	0.055	0.002	0.003	0.001	0.003	0.043	0.004	0.004	0.018	0.006	0.268	0.649
		EM rash or two-tiered serology	Count	61	9	23	26	13	54	6	11	4	2	62	1	18	2	10	93	3	0	8	0	113	6	5	2	3	78	5	7	36	14	354	1029
			% within em_rash_or_two_tiered	0.059	0.009	0.022	0.025	0.013	0.052	0.006	0.011	0.004	0.002	0.06	0.001	0.017	0.002	0.01	0.09	0.003	0	0.008	0	0.11	0.006	0.005	0.002	0.003	0.076	0.005	0.007	0.035	0.014	0.344	1
			% within Number of poor physical health days	0.412	0.346	0.418	0.388	0.382	0.338	0.273	0.244	0.211	0.667	0.318	0.5	0.429	0.5	0.455	0.389	0.5	0	0.32	0	0.414	0.462	0.357	0.4	0.25	0.384	0.313	0.35	0.4	0.424	0.311	0.351
			% of Total	0.021	0.003	0.008	0.009	0.004	0.018	0.002	0.004	0.001	0.001	0.021	0	0.006	0.001	0.003	0.032	0.001	0	0.003	0	0.039	0.002	0.002	0.001	0.001	0.027	0.002	0.002	0.012	0.005	0.121	0.351
	Total		Count	148	26	55	67	34	160	22	45	19	3	195	2	42	4	22	239	6	1	25	1	273	13	14	5	12	203	16	20	90	33	1140	2935
			% within em_rash_or_two_tiered	0.05	0.009	0.019	0.023	0.012	0.055	0.007	0.015	0.006	0.001	0.066	0.001	0.014	0.001	0.007	0.081	0.002	0	0.009	0	0.093	0.004	0.005	0.002	0.004	0.069	0.005	0.007	0.031	0.011	0.388	1
			% within Number of poor physical health days	1	1	1	1	1	1	1	1	1	1	1	1	1	1	1	1	1	1	1	1	1	1	1	1	1	1	1	1	1	1	1	1
			% of Total	0.05	0.009	0.019	0.023	0.012	0.055	0.007	0.015	0.006	0.001	0.066	0.001	0.014	0.001	0.007	0.081	0.002	0	0.009	0	0.093	0.004	0.005	0.002	0.004	0.069	0.005	0.007	0.031	0.011	0.388	1
	Crosstabulation: (Q: 8,9 by Q: 18) Diagnosed by EM rash or two-tiered serology by Number of poor mental health days
				Number of poor mental health days																															Total
				0	1	2	3	4	5	6	7	8	9	10	11	12	13	14	15	16	17	18	19	20	21	22	23	24	25	26	27	28	29	30
	Answered	Other laboratory data	Count	145	34	79	75	50	187	20	29	25	4	173	1	23	3	13	191	3	3	9	1	202	6	6	3	4	127	9	11	39	17	409	1901
			% within em_rash_or_two_tiered	0.076	0.018	0.042	0.039	0.026	0.098	0.011	0.015	0.013	0.002	0.091	0.001	0.012	0.002	0.007	0.1	0.002	0.002	0.005	0.001	0.106	0.003	0.003	0.002	0.002	0.067	0.005	0.006	0.021	0.009	0.215	1
			% within Number of poor mental health days	0.617	0.654	0.664	0.62	0.758	0.68	0.625	0.58	0.641	0.8	0.625	1	0.657	0.75	0.684	0.661	0.5	0.75	0.529	0.333	0.65	0.545	0.857	1	0.667	0.672	0.818	0.733	0.609	0.85	0.634	0.649
			% of Total	0.049	0.012	0.027	0.026	0.017	0.064	0.007	0.01	0.009	0.001	0.059	0	0.008	0.001	0.004	0.065	0.001	0.001	0.003	0	0.069	0.002	0.002	0.001	0.001	0.043	0.003	0.004	0.013	0.006	0.14	0.649
		EM rash or two-tiered serology	Count	90	18	40	46	16	88	12	21	14	1	104	0	12	1	6	98	3	1	8	2	109	5	1	0	2	62	2	4	25	3	236	1030
			% within em_rash_or_two_tiered	0.087	0.017	0.039	0.045	0.016	0.085	0.012	0.02	0.014	0.001	0.101	0	0.012	0.001	0.006	0.095	0.003	0.001	0.008	0.002	0.106	0.005	0.001	0	0.002	0.06	0.002	0.004	0.024	0.003	0.229	1
			% within Number of poor mental health days	0.383	0.346	0.336	0.38	0.242	0.32	0.375	0.42	0.359	0.2	0.375	0	0.343	0.25	0.316	0.339	0.5	0.25	0.471	0.667	0.35	0.455	0.143	0	0.333	0.328	0.182	0.267	0.391	0.15	0.366	0.351
			% of Total	0.031	0.006	0.014	0.016	0.005	0.03	0.004	0.007	0.005	0	0.035	0	0.004	0	0.002	0.033	0.001	0	0.003	0.001	0.037	0.002	0	0	0.001	0.021	0.001	0.001	0.009	0.001	0.081	0.351
	Total		Count	235	52	119	121	66	275	32	50	39	5	277	1	35	4	19	289	6	4	17	3	311	11	7	3	6	189	11	15	64	20	645	2931
			% within em_rash_or_two_tiered	0.08	0.018	0.041	0.041	0.023	0.094	0.011	0.017	0.013	0.002	0.095	0	0.012	0.001	0.006	0.099	0.002	0.001	0.006	0.001	0.106	0.004	0.002	0.001	0.002	0.064	0.004	0.005	0.022	0.007	0.22	1
			% within Number of poor mental health days	1	1	1	1	1	1	1	1	1	1	1	1	1	1	1	1	1	1	1	1	1	1	1	1	1	1	1	1	1	1	1	1
			% of Total	0.08	0.018	0.041	0.041	0.023	0.094	0.011	0.017	0.013	0.002	0.095	0	0.012	0.001	0.006	0.099	0.002	0.001	0.006	0.001	0.106	0.004	0.002	0.001	0.002	0.064	0.004	0.005	0.022	0.007	0.22	1
	Crosstabulation: (Q: 8,9 by Q: 19) Diagnosed by EM rash or two-tiered serology by Number of poor physical or mental days
				Number of poor physical or mental days																														Total
				0	1	2	3	4	5	6	7	8	9	10	12	13	14	15	16	17	18	19	20	21	22	23	24	25	26	27	28	29	30
	Answered	Other laboratory data	Count	196	31	58	49	34	123	18	23	23	5	167	15	2	16	156	5	3	14	0	172	8	7	3	7	127	11	12	45	13	568	1911
			% within em_rash_or_two_tiered	0.103	0.016	0.03	0.026	0.018	0.064	0.009	0.012	0.012	0.003	0.087	0.008	0.001	0.008	0.082	0.003	0.002	0.007	0	0.09	0.004	0.004	0.002	0.004	0.066	0.006	0.006	0.024	0.007	0.297	1
			% within Number of poor physical or mental days	0.609	0.838	0.644	0.653	0.63	0.586	0.72	0.639	0.639	0.556	0.671	0.6	0.667	0.696	0.622	0.625	1	0.636	0	0.621	0.615	0.778	1	0.875	0.62	0.733	0.923	0.662	0.619	0.685	0.65
			% of Total	0.067	0.011	0.02	0.017	0.012	0.042	0.006	0.008	0.008	0.002	0.057	0.005	0.001	0.005	0.053	0.002	0.001	0.005	0	0.058	0.003	0.002	0.001	0.002	0.043	0.004	0.004	0.015	0.004	0.193	0.65
		EM rash or two-tiered serology	Count	126	6	32	26	20	87	7	13	13	4	82	10	1	7	95	3	0	8	3	105	5	2	0	1	78	4	1	23	8	261	1031
			% within em_rash_or_two_tiered	0.122	0.006	0.031	0.025	0.019	0.084	0.007	0.013	0.013	0.004	0.08	0.01	0.001	0.007	0.092	0.003	0	0.008	0.003	0.102	0.005	0.002	0	0.001	0.076	0.004	0.001	0.022	0.008	0.253	1
			% within Number of poor physical or mental days	0.391	0.162	0.356	0.347	0.37	0.414	0.28	0.361	0.361	0.444	0.329	0.4	0.333	0.304	0.378	0.375	0	0.364	1	0.379	0.385	0.222	0	0.125	0.38	0.267	0.077	0.338	0.381	0.315	0.35
			% of Total	0.043	0.002	0.011	0.009	0.007	0.03	0.002	0.004	0.004	0.001	0.028	0.003	0	0.002	0.032	0.001	0	0.003	0.001	0.036	0.002	0.001	0	0	0.027	0.001	0	0.008	0.003	0.089	0.35
	Total		Count	322	37	90	75	54	210	25	36	36	9	249	25	3	23	251	8	3	22	3	277	13	9	3	8	205	15	13	68	21	829	2942
			% within em_rash_or_two_tiered	0.109	0.013	0.031	0.025	0.018	0.071	0.008	0.012	0.012	0.003	0.085	0.008	0.001	0.008	0.085	0.003	0.001	0.007	0.001	0.094	0.004	0.003	0.001	0.003	0.07	0.005	0.004	0.023	0.007	0.282	1
			% within Number of poor physical or mental days	1	1	1	1	1	1	1	1	1	1	1	1	1	1	1	1	1	1	1	1	1	1	1	1	1	1	1	1	1	1	1
			% of Total	0.109	0.013	0.031	0.025	0.018	0.071	0.008	0.012	0.012	0.003	0.085	0.008	0.001	0.008	0.085	0.003	0.001	0.007	0.001	0.094	0.004	0.003	0.001	0.003	0.07	0.005	0.004	0.023	0.007	0.282	1
	Crosstabulation: (Q: 8,9 by Q: 12) Diagnosed by EM rash or two-tiered serology by Severe_Symptom_Count
				Severe_Symptom_Count											Total
				0	1	2	3	4	5	6	7	8	9	10
	Answered	Other laboratory data	Count	492	250	214	205	191	168	133	119	101	75	30	1978
			% within em_rash_or_two_tiered	0.249	0.126	0.108	0.104	0.097	0.085	0.067	0.06	0.051	0.038	0.015	1
			% within Severe_Symptom_Count	0.673	0.646	0.624	0.637	0.637	0.68	0.658	0.636	0.66	0.641	0.545	0.65
			% of Total	0.162	0.082	0.07	0.067	0.063	0.055	0.044	0.039	0.033	0.025	0.01	0.65
		EM rash or two-tiered serology	Count	239	137	129	117	109	79	69	68	52	42	25	1066
			% within em_rash_or_two_tiered	0.224	0.129	0.121	0.11	0.102	0.074	0.065	0.064	0.049	0.039	0.023	1
			% within Severe_Symptom_Count	0.327	0.354	0.376	0.363	0.363	0.32	0.342	0.364	0.34	0.359	0.455	0.35
			% of Total	0.079	0.045	0.042	0.038	0.036	0.026	0.023	0.022	0.017	0.014	0.008	0.35
	Total		Count	731	387	343	322	300	247	202	187	153	117	55	3044
			% within em_rash_or_two_tiered	0.24	0.127	0.113	0.106	0.099	0.081	0.066	0.061	0.05	0.038	0.018	1
			% within Severe_Symptom_Count	1	1	1	1	1	1	1	1	1	1	1	1
			% of Total	0.24	0.127	0.113	0.106	0.099	0.081	0.066	0.061	0.05	0.038	0.018	1
	Crosstabulation: (Q: 8,9 by Q: 44) Diagnosed by EM rash or two-tiered serology by I currently have
				I currently have					Total
				Stopped working	Reduced work schedule	Changed nature of work	Made no changes	Not Applicable
	Answered	Other laboratory data	Count	780	324	222	286	229	1841
			% within em_rash_or_two_tiered	0.424	0.176	0.121	0.155	0.124	1
			% within I currently have	0.666	0.656	0.667	0.619	0.612	0.65
			% of Total	0.275	0.114	0.078	0.101	0.081	0.65
		EM rash or two-tiered serology	Count	391	170	111	176	145	993
			% within em_rash_or_two_tiered	0.394	0.171	0.112	0.177	0.146	1
			% within I currently have	0.334	0.344	0.333	0.381	0.388	0.35
			% of Total	0.138	0.06	0.039	0.062	0.051	0.35
	Total		Count	1171	494	333	462	374	2834
			% within em_rash_or_two_tiered	0.413	0.174	0.118	0.163	0.132	1
			% within I currently have	1	1	1	1	1	1
			% of Total	0.413	0.174	0.118	0.163	0.132	1
	Crosstabulation: (Q: 8,9 by Q: 33) Diagnosed by EM rash or two-tiered serology by Number of times you saw a health care professional
				Number of times you saw a health care professional
				0	1	2	3	4	5	6	7	8	9	10	11	12	13	14	15	16	17	18	19	20	21	22	23	24	25	26	27	28	29	30	31	32	33	34	35	36	37	38	40	41	42	44	45	46	47
	Answered	Other laboratory data	Count	57	20	37	73	86	89	155	56	119	21	143	12	147	15	34	121	31	11	28	8	132	5	12	5	35	44	13	3	5	1	82	0	5	1	1	19	10	1	4	31	1	1	1	14	4	0
			% within em_rash_or_two_tiered	0.031	0.011	0.02	0.039	0.046	0.048	0.083	0.03	0.064	0.011	0.077	0.006	0.079	0.008	0.018	0.065	0.017	0.006	0.015	0.004	0.071	0.003	0.006	0.003	0.019	0.024	0.007	0.002	0.003	0.001	0.044	0	0.003	0.001	0.001	0.01	0.005	0.001	0.002	0.017	0.001	0.001	0.001	0.008	0.002	0
			% within Number of times you saw a health care professional	0.6	0.556	0.5	0.64	0.573	0.659	0.695	0.7	0.665	0.5	0.596	0.75	0.665	0.789	0.642	0.72	0.795	0.688	0.667	0.889	0.68	1	0.632	0.714	0.673	0.657	0.722	0.75	0.833	0.333	0.636	0	0.714	0.333	0.333	0.559	0.588	0.5	0.5	0.633	1	0.5	1	0.636	1	0
			% of Total	0.02	0.007	0.013	0.025	0.03	0.031	0.054	0.019	0.041	0.007	0.05	0.004	0.051	0.005	0.012	0.042	0.011	0.004	0.01	0.003	0.046	0.002	0.004	0.002	0.012	0.015	0.005	0.001	0.002	0	0.029	0	0.002	0	0	0.007	0.003	0	0.001	0.011	0	0	0	0.005	0.001	0
		EM rash or two-tiered serology	Count	38	16	37	41	64	46	68	24	60	21	97	4	74	4	19	47	8	5	14	1	62	0	7	2	17	23	5	1	1	2	47	1	2	2	2	15	7	1	4	18	0	1	0	8	0	1
			% within em_rash_or_two_tiered	0.038	0.016	0.037	0.041	0.064	0.046	0.068	0.024	0.06	0.021	0.096	0.004	0.074	0.004	0.019	0.047	0.008	0.005	0.014	0.001	0.062	0	0.007	0.002	0.017	0.023	0.005	0.001	0.001	0.002	0.047	0.001	0.002	0.002	0.002	0.015	0.007	0.001	0.004	0.018	0	0.001	0	0.008	0	0.001
			% within Number of times you saw a health care professional	0.4	0.444	0.5	0.36	0.427	0.341	0.305	0.3	0.335	0.5	0.404	0.25	0.335	0.211	0.358	0.28	0.205	0.313	0.333	0.111	0.32	0	0.368	0.286	0.327	0.343	0.278	0.25	0.167	0.667	0.364	1	0.286	0.667	0.667	0.441	0.412	0.5	0.5	0.367	0	0.5	0	0.364	0	1
			% of Total	0.013	0.006	0.013	0.014	0.022	0.016	0.024	0.008	0.021	0.007	0.034	0.001	0.026	0.001	0.007	0.016	0.003	0.002	0.005	0	0.022	0	0.002	0.001	0.006	0.008	0.002	0	0	0.001	0.016	0	0.001	0.001	0.001	0.005	0.002	0	0.001	0.006	0	0	0	0.003	0	0
	Total		Count	95	36	74	114	150	135	223	80	179	42	240	16	221	19	53	168	39	16	42	9	194	5	19	7	52	67	18	4	6	3	129	1	7	3	3	34	17	2	8	49	1	2	1	22	4	1
			% within em_rash_or_two_tiered	0.033	0.013	0.026	0.04	0.052	0.047	0.078	0.028	0.062	0.015	0.084	0.006	0.077	0.007	0.018	0.058	0.014	0.006	0.015	0.003	0.068	0.002	0.007	0.002	0.018	0.023	0.006	0.001	0.002	0.001	0.045	0	0.002	0.001	0.001	0.012	0.006	0.001	0.003	0.017	0	0.001	0	0.008	0.001	0
			% within Number of times you saw a health care professional	1	1	1	1	1	1	1	1	1	1	1	1	1	1	1	1	1	1	1	1	1	1	1	1	1	1	1	1	1	1	1	1	1	1	1	1	1	1	1	1	1	1	1	1	1	1
			% of Total	0.033	0.013	0.026	0.04	0.052	0.047	0.078	0.028	0.062	0.015	0.084	0.006	0.077	0.007	0.018	0.058	0.014	0.006	0.015	0.003	0.068	0.002	0.007	0.002	0.018	0.023	0.006	0.001	0.002	0.001	0.045	0	0.002	0.001	0.001	0.012	0.006	0.001	0.003	0.017	0	0.001	0	0.008	0.001	0
	Crosstabulation: (Q: 8,9 by Q: 30) Diagnosed by EM rash or two-tiered serology by Number of times you have gone to emergency room
				Number of times you have gone to emergency room																										Total
				0	1	2	3	4	5	6	7	8	9	10	12	13	14	15	16	20	25	27	30	32	34	40	50	60	80
	Answered	Other laboratory data	Count	1196	324	144	95	33	22	20	8	9	2	5	1	1	1	1	1	6	1	1	2	1	1	0	1	0	1	1877
			% within em_rash_or_two_tiered	0.637	0.173	0.077	0.051	0.018	0.012	0.011	0.004	0.005	0.001	0.003	0.001	0.001	0.001	0.001	0.001	0.003	0.001	0.001	0.001	0.001	0.001	0	0.001	0	0.001	1
			% within Number of times you have gone to emergency room	0.669	0.649	0.533	0.693	0.589	0.524	0.571	0.615	0.75	0.667	0.556	1	1	0.333	1	0.5	0.6	0.5	1	1	1	1	0	1	0	1	0.649
			% of Total	0.414	0.112	0.05	0.033	0.011	0.008	0.007	0.003	0.003	0.001	0.002	0	0	0	0	0	0.002	0	0	0.001	0	0	0	0	0	0	0.649
		EM rash or two-tiered serology	Count	591	175	126	42	23	20	15	5	3	1	4	0	0	2	0	1	4	1	0	0	0	0	1	0	1	0	1015
			% within em_rash_or_two_tiered	0.582	0.172	0.124	0.041	0.023	0.02	0.015	0.005	0.003	0.001	0.004	0	0	0.002	0	0.001	0.004	0.001	0	0	0	0	0.001	0	0.001	0	1
			% within Number of times you have gone to emergency room	0.331	0.351	0.467	0.307	0.411	0.476	0.429	0.385	0.25	0.333	0.444	0	0	0.667	0	0.5	0.4	0.5	0	0	0	0	1	0	1	0	0.351
			% of Total	0.204	0.061	0.044	0.015	0.008	0.007	0.005	0.002	0.001	0	0.001	0	0	0.001	0	0	0.001	0	0	0	0	0	0	0	0	0	0.351
	Total		Count	1787	499	270	137	56	42	35	13	12	3	9	1	1	3	1	2	10	2	1	2	1	1	1	1	1	1	2892
			% within em_rash_or_two_tiered	0.618	0.173	0.093	0.047	0.019	0.015	0.012	0.004	0.004	0.001	0.003	0	0	0.001	0	0.001	0.003	0.001	0	0.001	0	0	0	0	0	0	1
			% within Number of times you have gone to emergency room	1	1	1	1	1	1	1	1	1	1	1	1	1	1	1	1	1	1	1	1	1	1	1	1	1	1	1
			% of Total	0.618	0.173	0.093	0.047	0.019	0.015	0.012	0.004	0.004	0.001	0.003	0	0	0.001	0	0.001	0.003	0.001	0	0.001	0	0	0	0	0	0	1
	Crosstabulation: (Q: 8,9 by Q: 31,32) Diagnosed by EM rash or two-tiered serology by number of nights spent in hospital
				number of nights spent in hospital																										Total
				0	1	2	3	4	5	6	7	8	10	12	13	15	16	17	20	21	22	25	28	32	34	35	37	40	50
	Answered	Other laboratory data	Count	1627	143	60	20	10	5	4	2	1	0	1	1	2	0	0	1	1	1	1	0	2	1	1	0	1	1	1886
			% within em_rash_or_two_tiered	0.863	0.076	0.032	0.011	0.005	0.003	0.002	0.001	0.001	0	0.001	0.001	0.001	0	0	0.001	0.001	0.001	0.001	0	0.001	0.001	0.001	0	0.001	0.001	1
			% within number of nights spent in hospital	0.661	0.598	0.606	0.541	0.556	0.333	0.5	0.667	1	0	0.5	1	0.667	0	0	1	1	1	1	0	1	1	1	0	1	1	0.649
			% of Total	0.56	0.049	0.021	0.007	0.003	0.002	0.001	0.001	0	0	0	0	0.001	0	0	0	0	0	0	0	0.001	0	0	0	0	0	0.649
		EM rash or two-tiered serology	Count	836	96	39	17	8	10	4	1	0	1	1	0	1	1	1	0	0	0	0	1	0	0	0	1	0	0	1018
			% within em_rash_or_two_tiered	0.821	0.094	0.038	0.017	0.008	0.01	0.004	0.001	0	0.001	0.001	0	0.001	0.001	0.001	0	0	0	0	0.001	0	0	0	0.001	0	0	1
			% within number of nights spent in hospital	0.339	0.402	0.394	0.459	0.444	0.667	0.5	0.333	0	1	0.5	0	0.333	1	1	0	0	0	0	1	0	0	0	1	0	0	0.351
			% of Total	0.288	0.033	0.013	0.006	0.003	0.003	0.001	0	0	0	0	0	0	0	0	0	0	0	0	0	0	0	0	0	0	0	0.351
	Total		Count	2463	239	99	37	18	15	8	3	1	1	2	1	3	1	1	1	1	1	1	1	2	1	1	1	1	1	2904
			% within em_rash_or_two_tiered	0.848	0.082	0.034	0.013	0.006	0.005	0.003	0.001	0	0	0.001	0	0.001	0	0	0	0	0	0	0	0.001	0	0	0	0	0	1
			% within number of nights spent in hospital	1	1	1	1	1	1	1	1	1	1	1	1	1	1	1	1	1	1	1	1	1	1	1	1	1	1	1
			% of Total	0.848	0.082	0.034	0.013	0.006	0.005	0.003	0.001	0	0	0.001	0	0.001	0	0	0	0	0	0	0	0.001	0	0	0	0	0	1
	Crosstabulation: (Q: 8,9 by Q: 33,34) Diagnosed by EM rash or two-tiered serology by number of home care visits
				number of home care visits
				0	1	2	3	4	5	6	7	8	9	10	11	12	13	14	15	16	17	18	20	22	24	25	26	27	28	30	32	35	36	37	40	42	44	45	48	50	52	54	55	56	58	60	62	65	72
	Answered	Other laboratory data	Count	1647	10	11	8	13	12	19	3	8	4	16	2	22	2	7	5	9	1	3	10	1	13	7	0	1	1	4	2	1	2	1	3	0	0	1	5	7	7	2	0	1	2	1	0	0	1
			% within em_rash_or_two_tiered	0.873	0.005	0.006	0.004	0.007	0.006	0.01	0.002	0.004	0.002	0.008	0.001	0.012	0.001	0.004	0.003	0.005	0.001	0.002	0.005	0.001	0.007	0.004	0	0.001	0.001	0.002	0.001	0.001	0.001	0.001	0.002	0	0	0.001	0.003	0.004	0.004	0.001	0	0.001	0.001	0.001	0	0	0.001
			% within number of home care visits	0.65	0.625	0.647	0.8	0.565	0.571	0.731	0.429	0.533	1	0.64	1	0.688	0.667	0.7	0.455	0.75	0.5	0.5	0.667	0.5	0.813	0.583	0	0.5	0.2	0.571	1	1	0.5	1	0.75	0	0	0.5	0.833	0.778	0.467	1	0	1	1	1	0	0	1
			% of Total	0.566	0.003	0.004	0.003	0.004	0.004	0.007	0.001	0.003	0.001	0.006	0.001	0.008	0.001	0.002	0.002	0.003	0	0.001	0.003	0	0.004	0.002	0	0	0	0.001	0.001	0	0.001	0	0.001	0	0	0	0.002	0.002	0.002	0.001	0	0	0.001	0	0	0	0
		EM rash or two-tiered serology	Count	885	6	6	2	10	9	7	4	7	0	9	0	10	1	3	6	3	1	3	5	1	3	5	1	1	4	3	0	0	2	0	1	1	1	1	1	2	8	0	1	0	0	0	1	1	0
			% within em_rash_or_two_tiered	0.867	0.006	0.006	0.002	0.01	0.009	0.007	0.004	0.007	0	0.009	0	0.01	0.001	0.003	0.006	0.003	0.001	0.003	0.005	0.001	0.003	0.005	0.001	0.001	0.004	0.003	0	0	0.002	0	0.001	0.001	0.001	0.001	0.001	0.002	0.008	0	0.001	0	0	0	0.001	0.001	0
			% within number of home care visits	0.35	0.375	0.353	0.2	0.435	0.429	0.269	0.571	0.467	0	0.36	0	0.313	0.333	0.3	0.545	0.25	0.5	0.5	0.333	0.5	0.188	0.417	1	0.5	0.8	0.429	0	0	0.5	0	0.25	1	1	0.5	0.167	0.222	0.533	0	1	0	0	0	1	1	0
			% of Total	0.304	0.002	0.002	0.001	0.003	0.003	0.002	0.001	0.002	0	0.003	0	0.003	0	0.001	0.002	0.001	0	0.001	0.002	0	0.001	0.002	0	0	0.001	0.001	0	0	0.001	0	0	0	0	0	0	0.001	0.003	0	0	0	0	0	0	0	0
	Total		Count	2532	16	17	10	23	21	26	7	15	4	25	2	32	3	10	11	12	2	6	15	2	16	12	1	2	5	7	2	1	4	1	4	1	1	2	6	9	15	2	1	1	2	1	1	1	1
			% within em_rash_or_two_tiered	0.871	0.006	0.006	0.003	0.008	0.007	0.009	0.002	0.005	0.001	0.009	0.001	0.011	0.001	0.003	0.004	0.004	0.001	0.002	0.005	0.001	0.006	0.004	0	0.001	0.002	0.002	0.001	0	0.001	0	0.001	0	0	0.001	0.002	0.003	0.005	0.001	0	0	0.001	0	0	0	0
			% within number of home care visits	1	1	1	1	1	1	1	1	1	1	1	1	1	1	1	1	1	1	1	1	1	1	1	1	1	1	1	1	1	1	1	1	1	1	1	1	1	1	1	1	1	1	1	1	1	1
			% of Total	0.871	0.006	0.006	0.003	0.008	0.007	0.009	0.002	0.005	0.001	0.009	0.001	0.011	0.001	0.003	0.004	0.004	0.001	0.002	0.005	0.001	0.006	0.004	0	0.001	0.002	0.002	0.001	0	0.001	0	0.001	0	0	0.001	0.002	0.003	0.005	0.001	0	0	0.001	0	0	0	0
	Crosstabulation: (Q: 8,9 by Q: 29) Diagnosed by EM rash or two-tiered serology by During the PAST 12 MONTHS, about how much did you or your family spend on medical care for Lyme disease? Do NOT include the cost of over-the-counter remedies, the cost of insurance premiums, or any costs for which you expect to be reimbursed.
				During the PAST 12 MONTHS, about how much did you or your family spend on medical care for Lyme disease? Do NOT include the cost of over-the-counter remedies, the cost of insurance premiums, or any costs for which you expect to be reimbursed.										Total
				Zero	Less than $500	$500-1999	$2000-2,999	$3,000-4,999	$5,000-$9,999	$10,000-$14,999	$15,000-$19,999	$20,000 or more	I don't know
	Answered	Other laboratory data	Count	85	136	284	226	249	328	212	105	202	83	1910
			% within em_rash_or_two_tiered	0.045	0.071	0.149	0.118	0.13	0.172	0.111	0.055	0.106	0.043	1
			% within During the PAST 12 MONTHS, about how much did you or your family spend on medical care for Lyme disease? Do NOT include the cost of over-the-counter remedies, the cost of insurance premiums, or any costs for which you expect to be reimbursed.	0.518	0.521	0.659	0.671	0.624	0.659	0.739	0.705	0.729	0.593	0.649
			% of Total	0.029	0.046	0.097	0.077	0.085	0.111	0.072	0.036	0.069	0.028	0.649
		EM rash or two-tiered serology	Count	79	125	147	111	150	170	75	44	75	57	1033
			% within em_rash_or_two_tiered	0.076	0.121	0.142	0.107	0.145	0.165	0.073	0.043	0.073	0.055	1
			% within During the PAST 12 MONTHS, about how much did you or your family spend on medical care for Lyme disease? Do NOT include the cost of over-the-counter remedies, the cost of insurance premiums, or any costs for which you expect to be reimbursed.	0.482	0.479	0.341	0.329	0.376	0.341	0.261	0.295	0.271	0.407	0.351
			% of Total	0.027	0.042	0.05	0.038	0.051	0.058	0.025	0.015	0.025	0.019	0.351
	Total		Count	164	261	431	337	399	498	287	149	277	140	2943
			% within em_rash_or_two_tiered	0.056	0.089	0.146	0.115	0.136	0.169	0.098	0.051	0.094	0.048	1
			% within During the PAST 12 MONTHS, about how much did you or your family spend on medical care for Lyme disease? Do NOT include the cost of over-the-counter remedies, the cost of insurance premiums, or any costs for which you expect to be reimbursed.	1	1	1	1	1	1	1	1	1	1	1
			% of Total	0.056	0.089	0.146	0.115	0.136	0.169	0.098	0.051	0.094	0.048	1
	Symptom Severity
	Q. 12: How would you rate your current symptoms of Lyme disease
			None	Very Mild	Mild	Moderate	Severe	Very Severe	Total	Did not answer	Total
		Fatigue	89	174	372	930	895	567	3027	63	3090
		%	0.029402	0.0574827	0.122894	0.307235	0.295672	0.187314	1
		Headaches	519	372	590	825	424	255	2985	105	3090
		%	0.173869	0.124623	0.197655	0.276382	0.142044	0.0854271	1
		Joint Pain	220	280	399	939	712	468	3018	72	3090
		%	0.072896	0.0927767	0.132207	0.311133	0.235918	0.15507	1
		Other Pain	335	255	392	929	606	396	2913	177	3090
		%	0.115002	0.0875386	0.134569	0.318915	0.208033	0.135942	1
		Muscle Aches	226	249	442	1001	706	377	3001	89	3090
		%	0.0753082	0.0829723	0.147284	0.333555	0.235255	0.125625	1
		Neuropathy	411	300	449	862	612	320	2954	136	3090
		%	0.139133	0.101557	0.151997	0.291808	0.207177	0.108328	1
		Cognitive Impairment	194	317	497	1015	634	331	2988	102	3090
		%	0.0649264	0.106091	0.166332	0.339692	0.212182	0.110776	1
		Sleep Impairment	259	287	410	821	679	544	3000	90	3090
		%	0.0863333	0.0956667	0.136667	0.273667	0.226333	0.181333	1
		Depression, anxiety or other emotional impairment	270	368	492	850	619	392	2991	99	3090
		%	0.0902708	0.123036	0.164493	0.284186	0.206954	0.13106	1
		Heart Related	1034	454	579	626	180	105	2978	112	3090
		%	0.347213	0.152451	0.194426	0.210208	0.0604433	0.0352586	1
	Severe Symptom Count
			Frequency	Percent	Valid Percent	Cumulative Percent
	Valid	0	731	23.7	24	24
		1	387	12.5	12.7	36.7
		2	343	11.1	11.3	48
		3	322	10.4	10.6	58.6
		4	300	9.7	9.9	68.4
		5	247	8	8.1	76.5
		6	202	6.5	6.6	83.2
		7	187	6.1	6.1	89.3
		8	153	5	5	94.3
		9	117	3.8	3.8	98.2
		10	55	1.8	1.8	100
		Total	3044	98.5	100
	Missing	System	46	1.5
	Total		3090	100
	Descriptives
	Severe Symptom Count by Fair/Poor General Health (1)
		N	Mean	Std. Deviation	Std. Error	95% Confidence Interval for Mean		Minimum	Maximum
						Lower Bound	Upper Bound
	0	837	1.0717	1.7083	0.05905	0.9558	1.1876	0	9
	1	2179	4.0404	2.79794	0.05994	3.9228	4.1579	0	10
	Total	3016	3.2165	2.86915	0.05224	3.1141	3.3189	0	10
	Correlations
				General Health	Fatigue	Headaches	Joint pain	Other pain	Muscle aches	Neuropathy	Cognitive impairment	Sleep impairment	Depression, anxiety or other emotional impairment	Heart related
	Spearman's rho	General Health	Correlation Coefficient	1	.622**	.424**	.409**	.524**	.491**	.443**	.506**	.456**	.475**	.307**
			Sig. (2-tailed)	.	0	0	0	0	0	0	0	0	0	0
			N	3021	2999	2958	2991	2886	2974	2927	2962	2972	2965	2951
		Fatigue	Correlation Coefficient	.622**	1	.498**	.473**	.546**	.561**	.424**	.560**	.549**	.504**	.300**
			Sig. (2-tailed)	0	.	0	0	0	0	0	0	0	0	0
			N	2999	3027	2980	3002	2908	2989	2947	2979	2992	2985	2970
		Headaches	Correlation Coefficient	.424**	.498**	1	.410**	.456**	.449**	.355**	.415**	.411**	.377**	.337**
			Sig. (2-tailed)	0	0	.	0	0	0	0	0	0	0	0
			N	2958	2980	2985	2972	2883	2963	2918	2954	2963	2958	2945
		Joint pain	Correlation Coefficient	.409**	.473**	.410**	1	.670**	.718**	.425**	.375**	.422**	.363**	.253**
			Sig. (2-tailed)	0	0	0	.	0	0	0	0	0	0	0
			N	2991	3002	2972	3018	2898	2984	2936	2970	2982	2973	2963
		Other pain	Correlation Coefficient	.524**	.546**	.456**	.670**	1	.762**	.536**	.467**	.478**	.456**	.327**
			Sig. (2-tailed)	0	0	0	0	.	0	0	0	0	0	0
			N	2886	2908	2883	2898	2913	2894	2855	2880	2891	2884	2874
		Muscle aches	Correlation Coefficient	.491**	.561**	.449**	.718**	.762**	1	.499**	.455**	.468**	.436**	.303**
			Sig. (2-tailed)	0	0	0	0	0	.	0	0	0	0	0
			N	2974	2989	2963	2984	2894	3001	2927	2960	2973	2965	2952
		Neuropathy	Correlation Coefficient	.443**	.424**	.355**	.425**	.536**	.499**	1	.529**	.411**	.392**	.327**
			Sig. (2-tailed)	0	0	0	0	0	0	.	0	0	0	0
			N	2927	2947	2918	2936	2855	2927	2954	2921	2929	2924	2914
		Cognitive impairment	Correlation Coefficient	.506**	.560**	.415**	.375**	.467**	.455**	.529**	1	.522**	.528**	.341**
			Sig. (2-tailed)	0	0	0	0	0	0	0	.	0	0	0
			N	2962	2979	2954	2970	2880	2960	2921	2988	2966	2959	2946
		Sleep impairment	Correlation Coefficient	.456**	.549**	.411**	.422**	.478**	.468**	.411**	.522**	1	.551**	.317**
			Sig. (2-tailed)	0	0	0	0	0	0	0	0	.	0	0
			N	2972	2992	2963	2982	2891	2973	2929	2966	3000	2970	2957
		Depression, anxiety or other emotional impairment	Correlation Coefficient	.475**	.504**	.377**	.363**	.456**	.436**	.392**	.528**	.551**	1	.323**
			Sig. (2-tailed)	0	0	0	0	0	0	0	0	0	.	0
			N	2965	2985	2958	2973	2884	2965	2924	2959	2970	2991	2952
		Heart related	Correlation Coefficient	.307**	.300**	.337**	.253**	.327**	.303**	.327**	.341**	.317**	.323**	1
			Sig. (2-tailed)	0	0	0	0	0	0	0	0	0	0	.
			N	2951	2970	2945	2963	2874	2952	2914	2946	2957	2952	2978
	** Correlation is significant at the 0.01 level (2-tailed).
	Ordinal Regression of Symptoms on General Health Status
	Pseudo R-Square
	Cox and Snell	0.502
	Nagelkerke	0.544
	McFadden	0.271
	Link function: Logit.
	Parameter Estimates
			Estimate	Std. Error	Wald	df	Sig.	95% Confidence Interval
								Lower Bound	Upper Bound
	Threshold	[General_Health = 1.00]	-10.798	0.434	618.084	1	0	-11.65	-9.947
		[General_Health = 2.00]	-8.342	0.391	454.323	1	0	-9.109	-7.575
		[General_Health = 3.00]	-5.955	0.377	249.382	1	0	-6.695	-5.216
		[General_Health = 4.00]	-3.309	0.366	81.903	1	0	-4.025	-2.592
	Location	[Fatigue=1.00]	-3.909	0.301	168.086	1	0	-4.5	-3.318
		[Fatigue=2.00]	-3.207	0.237	182.491	1	0	-3.672	-2.742
		[Fatigue=3.00]	-2.294	0.187	150.632	1	0	-2.66	-1.928
		[Fatigue=4.00]	-1.639	0.151	117.184	1	0	-1.936	-1.342
		[Fatigue=5.00]	-0.652	0.141	21.323	1	0	-0.929	-0.375
		[Fatigue=6.00]	0a	.	.	0	.	.	.
		[Headaches=1.00]	-0.447	0.207	4.659	1	0.031	-0.854	-0.041
		[Headaches=2.00]	-0.544	0.207	6.889	1	0.009	-0.951	-0.138
		[Headaches=3.00]	-0.395	0.194	4.128	1	0.042	-0.776	-0.014
		[Headaches=4.00]	-0.283	0.187	2.289	1	0.13	-0.649	0.083
		[Headaches=5.00]	-0.133	0.202	0.434	1	0.51	-0.528	0.262
		[Headaches=6.00]	0a	.	.	0	.	.	.
		[Joint_Pain=1.00]	0.223	0.232	0.924	1	0.336	-0.232	0.677
		[Joint_Pain=2.00]	0.195	0.217	0.811	1	0.368	-0.23	0.621
		[Joint_Pain=3.00]	0.009	0.192	0.002	1	0.962	-0.368	0.386
		[Joint_Pain=4.00]	0.132	0.167	0.626	1	0.429	-0.195	0.459
		[Joint_Pain=5.00]	0.244	0.162	2.262	1	0.133	-0.074	0.562
		[Joint_Pain=6.00]	0a	.	.	0	.	.	.
		[Other_Pain=1.00]	-1.407	0.246	32.719	1	0	-1.889	-0.925
		[Other_Pain=2.00]	-1.094	0.245	19.92	1	0	-1.574	-0.614
		[Other_Pain=3.00]	-1.274	0.223	32.721	1	0	-1.71	-0.837
		[Other_Pain=4.00]	-0.811	0.198	16.785	1	0	-1.199	-0.423
		[Other_Pain=5.00]	-0.567	0.191	8.831	1	0.003	-0.941	-0.193
		[Other_Pain=6.00]	0a	.	.	0	.	.	.
		[Muscle_Aches=1.00]	-0.32	0.283	1.282	1	0.258	-0.874	0.234
		[Muscle_Aches=2.00]	-0.335	0.264	1.612	1	0.204	-0.852	0.182
		[Muscle_Aches=3.00]	0.044	0.233	0.036	1	0.849	-0.412	0.5
		[Muscle_Aches=4.00]	-0.077	0.207	0.138	1	0.71	-0.483	0.329
		[Muscle_Aches=5.00]	0.051	0.195	0.069	1	0.793	-0.331	0.433
		[Muscle_Aches=6.00]	0a	.	.	0	.	.	.
		[Neuropathy=1.00]	-0.697	0.207	11.302	1	0.001	-1.103	-0.291
		[Neuropathy=2.00]	-0.656	0.212	9.559	1	0.002	-1.073	-0.24
		[Neuropathy=3.00]	-0.504	0.197	6.536	1	0.011	-0.891	-0.118
		[Neuropathy=4.00]	-0.37	0.183	4.085	1	0.043	-0.729	-0.011
		[Neuropathy=5.00]	-0.195	0.185	1.117	1	0.291	-0.557	0.167
		[Neuropathy=6.00]	0a	.	.	0	.	.	.
		[Cognitive_Impairment=1.00]	-1.049	0.257	16.701	1	0	-1.552	-0.546
		[Cognitive_Impairment=2.00]	-0.724	0.221	10.703	1	0.001	-1.158	-0.29
		[Cognitive_Impairment=3.00]	-0.526	0.2	6.913	1	0.009	-0.918	-0.134
		[Cognitive_Impairment=4.00]	-0.178	0.183	0.95	1	0.33	-0.536	0.18
		[Cognitive_Impairment=5.00]	-0.034	0.184	0.034	1	0.855	-0.393	0.326
		[Cognitive_Impairment=6.00]	0a	.	.	0	.	.	.
		[Sleep_Impairment=1.00]	-0.095	0.209	0.208	1	0.648	-0.505	0.315
		[Sleep_Impairment=2.00]	-0.139	0.187	0.554	1	0.457	-0.506	0.227
		[Sleep_Impairment=3.00]	-0.258	0.167	2.389	1	0.122	-0.585	0.069
		[Sleep_Impairment=4.00]	-0.023	0.145	0.024	1	0.876	-0.306	0.261
		[Sleep_Impairment=5.00]	-0.092	0.143	0.416	1	0.519	-0.373	0.188
		[Sleep_Impairment=6.00]	0a	.	.	0	.	.	.
		[Depression=1.00]	-0.986	0.215	20.959	1	0	-1.409	-0.564
		[Depression=2.00]	-0.904	0.195	21.529	1	0	-1.286	-0.522
		[Depression=3.00]	-0.744	0.182	16.693	1	0	-1.1	-0.387
		[Depression=4.00]	-0.538	0.168	10.237	1	0.001	-0.867	-0.208
		[Depression=5.00]	-0.378	0.171	4.904	1	0.027	-0.713	-0.043
		[Depression=6.00]	0a	.	.	0	.	.	.
		[Heart_Related=1.00]	-0.862	0.321	7.207	1	0.007	-1.491	-0.233
		[Heart_Related=2.00]	-0.644	0.328	3.852	1	0.05	-1.287	-0.001
		[Heart_Related=3.00]	-0.716	0.325	4.864	1	0.027	-1.352	-0.08
		[Heart_Related=4.00]	-0.733	0.323	5.161	1	0.023	-1.365	-0.101
		[Heart_Related=5.00]	-0.353	0.358	0.97	1	0.325	-1.055	0.349
		[Heart_Related=6.00]	0a	.	.	0	.	.	.
	Link function: Logit.
	a This parameter is set to zero because it is redundant.
	Increased Utilization of Services
	Q. 30: Number of times you have gone to emergency room
			Frequency	Percent	Answered Percent	Cumulative Percent
	Answered	0	1787	57.8	61.8	61.8
		1	499	16.1	17.3	79
		2	270	8.7	9.3	88.4
		3	137	4.4	4.7	93.1
		4	56	1.8	1.9	95.1
		5	42	1.4	1.5	96.5
		6	35	1.1	1.2	97.7
		7	13	0.4	0.4	98.2
		8	12	0.4	0.4	98.6
		9	3	0.1	0.1	98.7
		10	9	0.3	0.3	99
		12	1	0	0	99
		13	1	0	0	99.1
		14	3	0.1	0.1	99.2
		15	1	0	0	99.2
		16	2	0.1	0.1	99.3
		20	10	0.3	0.3	99.6
		25	2	0.1	0.1	99.7
		27	1	0	0	99.7
		30	2	0.1	0.1	99.8
		32	1	0	0	99.8
		34	1	0	0	99.9
		40	1	0	0	99.9
		50	1	0	0	99.9
		60	1	0	0	100
		80	1	0	0	100
		Total	2892	93.6	100
	Did not answer		198	6.4
	Total		3090	100
	Q. 31: During the PAST 12 MONTHS were you a patient in a hospital OVERNIGHT? (Hospital stays due to childbirth are included, but overnight stays in an emergency room are excluded.)
			Frequency	Percent	Answered Percent	Cumulative Percent
	Answered	Yes	437	14.1	15.1	15.1
		No	2443	79.1	84.6	99.7
		I don't know	8	0.3	0.3	100
		Total	2888	93.5	100
	Did not answer		202	6.5
	Total		3090	100
	* 15.2% answered yes if the "I don't know" respondents are exluded.
	Q. 32: Number of times you stayed in hospital overnight
			Frequency	Percent	Answered Percent	Cumulative Percent
	Answered	0	2081	67.3	82.5	82.5
		1	239	7.7	9.5	92
		2	99	3.2	3.9	95.9
		3	37	1.2	1.5	97.4
		4	18	0.6	0.7	98.1
		5	15	0.5	0.6	98.7
		6	8	0.3	0.3	99
		7	3	0.1	0.1	99.1
		8	1	0	0	99.2
		10	1	0	0	99.2
		12	2	0.1	0.1	99.3
		13	1	0	0	99.3
		15	3	0.1	0.1	99.4
		16	1	0	0	99.5
		17	1	0	0	99.5
		20	1	0	0	99.6
		21	1	0	0	99.6
		22	1	0	0	99.6
		25	1	0	0	99.7
		28	1	0	0	99.7
		32	2	0.1	0.1	99.8
		34	1	0	0	99.8
		35	1	0	0	99.9
		37	1	0	0	99.9
		40	1	0	0	100
		50	1	0	0	100
		Total	2522	81.6	100
	Did not answer		568	18.4
	Total		3090	100
	Q. 33: Number of times you saw a health care professional
			Frequency	Percent	Answered Percent	Cumulative Percent
	Answered	0	95	3.1	3.3	3.3
		1	36	1.2	1.3	4.6
		2	74	2.4	2.6	7.1
		3	114	3.7	4	11.1
		4	150	4.9	5.2	16.3
		5	135	4.4	4.7	21
		6	223	7.2	7.8	28.8
		7	80	2.6	2.8	31.6
		8	179	5.8	6.2	37.8
		9	42	1.4	1.5	39.3
		10	240	7.8	8.4	47.6
		11	16	0.5	0.6	48.2
		12	221	7.2	7.7	55.9
		13	19	0.6	0.7	56.5
		14	53	1.7	1.8	58.4
		15	168	5.4	5.8	64.2
		16	39	1.3	1.4	65.6
		17	16	0.5	0.6	66.2
		18	42	1.4	1.5	67.6
		19	9	0.3	0.3	67.9
		20	194	6.3	6.8	74.7
		21	5	0.2	0.2	74.9
		22	19	0.6	0.7	75.5
		23	7	0.2	0.2	75.8
		24	52	1.7	1.8	77.6
		25	67	2.2	2.3	79.9
		26	18	0.6	0.6	80.5
		27	4	0.1	0.1	80.7
		28	6	0.2	0.2	80.9
		29	3	0.1	0.1	81
		30	129	4.2	4.5	85.5
		31	1	0	0	85.5
		32	7	0.2	0.2	85.8
		33	3	0.1	0.1	85.9
		34	3	0.1	0.1	86
		35	34	1.1	1.2	87.2
		36	17	0.6	0.6	87.7
		37	2	0.1	0.1	87.8
		38	8	0.3	0.3	88.1
		40	49	1.6	1.7	89.8
		41	1	0	0	89.8
		42	2	0.1	0.1	89.9
		44	1	0	0	89.9
		45	22	0.7	0.8	90.7
		46	4	0.1	0.1	90.8
		47	1	0	0	90.9
		48	9	0.3	0.3	91.2
		49	2	0.1	0.1	91.3
		50	56	1.8	1.9	93.2
		52	7	0.2	0.2	93.5
		53	2	0.1	0.1	93.5
		54	1	0	0	93.6
		55	6	0.2	0.2	93.8
		56	3	0.1	0.1	93.9
		57	2	0.1	0.1	93.9
		58	2	0.1	0.1	94
		60	35	1.1	1.2	95.2
		61	1	0	0	95.3
		62	1	0	0	95.3
		63	1	0	0	95.3
		64	1	0	0	95.4
		65	10	0.3	0.3	95.7
		66	1	0	0	95.8
		70	10	0.3	0.3	96.1
		72	2	0.1	0.1	96.2
		74	1	0	0	96.2
		75	13	0.4	0.5	96.7
		76	1	0	0	96.7
		77	1	0	0	96.7
		78	1	0	0	96.8
		80	9	0.3	0.3	97.1
		84	3	0.1	0.1	97.2
		85	2	0.1	0.1	97.2
		87	2	0.1	0.1	97.3
		89	1	0	0	97.4
		90	4	0.1	0.1	97.5
		94	1	0	0	97.5
		95	5	0.2	0.2	97.7
		96	2	0.1	0.1	97.8
		100	19	0.6	0.7	98.4
		104	1	0	0	98.5
		108	1	0	0	98.5
		110	1	0	0	98.5
		112	1	0	0	98.6
		116	1	0	0	98.6
		120	5	0.2	0.2	98.8
		125	3	0.1	0.1	98.9
		130	3	0.1	0.1	99
		135	2	0.1	0.1	99.1
		136	1	0	0	99.1
		145	2	0.1	0.1	99.2
		146	1	0	0	99.2
		150	6	0.2	0.2	99.4
		155	2	0.1	0.1	99.5
		156	1	0	0	99.5
		160	1	0	0	99.5
		180	2	0.1	0.1	99.6
		200	4	0.1	0.1	99.8
		240	1	0	0	99.8
		242	1	0	0	99.8
		245	1	0	0	99.9
		250	2	0.1	0.1	99.9
		280	1	0	0	100
		365	1	0	0	100
		Total	2872	92.9	100
	Did not answer		218	7.1
	Total		3090	100
	Q. 34: During the PAST 12 MONTHS, did you receive CARE AT HOME from a nurse or other health care professional?
			Frequency	Percent	Answered Percent	Cumulative Percent
	Answered	Yes	368	11.9	12.7	12.7
		No	2517	81.5	87	99.8
		I don't know	7	0.2	0.2	100
		Total	2892	93.6	100
	Did not answer		198	6.4
	Total		3090	100
	Q. 35: Number of home visits
			Frequency	Percent	Answered Percent	Cumulative Percent
	Answered	0	2069	67	84.6	84.6
		1	16	0.5	0.7	85.3
		2	17	0.6	0.7	86
		3	10	0.3	0.4	86.4
		4	23	0.7	0.9	87.3
		5	21	0.7	0.9	88.2
		6	26	0.8	1.1	89.2
		7	7	0.2	0.3	89.5
		8	15	0.5	0.6	90.1
		9	4	0.1	0.2	90.3
		10	25	0.8	1	91.3
		11	2	0.1	0.1	91.4
		12	32	1	1.3	92.7
		13	3	0.1	0.1	92.8
		14	10	0.3	0.4	93.3
		15	11	0.4	0.4	93.7
		16	12	0.4	0.5	94.2
		17	2	0.1	0.1	94.3
		18	6	0.2	0.2	94.5
		20	15	0.5	0.6	95.1
		22	2	0.1	0.1	95.2
		24	16	0.5	0.7	95.9
		25	12	0.4	0.5	96.4
		26	1	0	0	96.4
		27	2	0.1	0.1	96.5
		28	5	0.2	0.2	96.7
		30	7	0.2	0.3	97
		32	2	0.1	0.1	97.1
		35	1	0	0	97.1
		36	4	0.1	0.2	97.3
		37	1	0	0	97.3
		40	4	0.1	0.2	97.5
		42	1	0	0	97.5
		44	1	0	0	97.5
		45	2	0.1	0.1	97.6
		48	6	0.2	0.2	97.9
		50	9	0.3	0.4	98.2
		52	15	0.5	0.6	98.9
		54	2	0.1	0.1	98.9
		55	1	0	0	99
		56	1	0	0	99
		58	2	0.1	0.1	99.1
		60	1	0	0	99.1
		62	1	0	0	99.2
		65	1	0	0	99.2
		72	1	0	0	99.3
		90	1	0	0	99.3
		96	1	0	0	99.3
		100	3	0.1	0.1	99.5
		104	1	0	0	99.5
		112	1	0	0	99.6
		120	2	0.1	0.1	99.6
		150	2	0.1	0.1	99.7
		155	1	0	0	99.8
		175	1	0	0	99.8
		250	1	0	0	99.8
		365	4	0.1	0.2	100
		Total	2445	79.1	100
	Did not answer		645	20.9
	Total		3090	100
	Q. 29: During the PAST 12 MONTHS, about how much did you or your family spend on medical care for Lyme disease? Do NOT include the cost of over-the-counter remedies, the cost of insurance premiums, or any costs for which you expect to be reimbursed.
			Frequency	Percent	Answered Percent	Cumulative Percent
	Answered	Zero	164	5.3	0.0585087	0.0585087
		Less than $500	261	8.4	0.0931145	0.151623
		$500-1999	431	13.9	0.153764	0.305387
		$2000-2,999	337	10.9	0.120228	0.425615
		$3,000-4,999	399	12.9	0.142347	0.567963
		$5,000-$9,999	498	16.1	0.177667	0.74563
		$10,000-$14,999	287	9.3	0.10239	0.84802
		$15,000-$19,999	149	4.8	0.0531573	0.901177
		$20,000 or more	277	9	0.0988227	1
		I don't know	140	4.5
		Total	2943	95.2
	Did not answer		147	4.8
	Total		3090	100
	Productivity Losses
	Crosstabulation: (Q: 49 by Q: 39) Age 25-54 by job (employed full or part time)
				job		Total
				0	1
	age25_54	0	Count	700	395	1095
			% within age25_54	0.639	0.361	1
			% within job	0.424	0.329	0.384
		1	Count	949	805	1754
			% within age25_54	0.541	0.459	1
			% within job	0.576	0.671	0.616
	Total		Count	1649	1200	2849
			% within age25_54	0.579	0.421	1
			% within job	1	1	1
	Q. 39: Are you presently employed?
			Frequency	Percent	Answered Percent	Cumulative Percent
	Answered	No	1672	54.1	57.9	57.9
		Yes, full time	765	24.8	26.5	84.4
		Yes, part time	452	14.6	15.6	100
		Total	2889	93.5	100
	Did not answer		201	6.5
	Total		3090	100
	Not previously working	520	0.184922
	Stopped Working	1169	0.415718
	Reduced Full	150	0.0533428
	Reduced Part	280	0.0995733
	Changed Full	182	0.0647226
	Changed Part	86	0.0305832
	Made No Changes Full	375	0.133357
	Made No Changes Part	50	0.0177809
	Subtotal	2812	1
	Contradictory/Unclear	94
	Total	2906
	Crosstabulation: (Q: 44 by Q: 39) Work changes as a result of Lyme Disease by Present Employment Status
			Are you presently employed?			Total
			No	Yes, full time	Yes, part time
	I currently have	Stopped working	1169	18	10	1197
		Reduced work schedule	80	150	280	510
		Changed nature of work	74	182	86	342
		Made no changes	48	375	50	473
		Not Applicable	318	43	23	384
	Total		1689	768	449	2906
	Q. 44: Tell us about the impact of physical, mental, work, and emotion problems resulting from you Lyme disease on your life.
			Frequency	Percent	Answered Percent	Cumulative Percent
	Answered	Stopped working	1171	37.9	41.3	41.3
		Reduced work schedule	494	16	17.4	58.8
		Changed nature of work	333	10.8	11.8	70.5
		Made no changes	462	15	16.3	86.8
		Not Applicable	374	12.1	13.2	100
		Total	2834	91.7	100
	Did not answer		256	8.3
	Total		3090	100
	Q. 46: Have you ever received private, state, or public disability benefits due to Lyme disease?
			Frequency	Percent	Answered Percent	Cumulative Percent
	Answered	Yes	679	22	23.7	23.7
		No	2190	70.9	76.3	100
		Total	2869	92.8	100
	Did not answer		221	7.2
	Total		3090	100
	absenteeism_240							* Some users entered text responses. Answers such as "&gt;120" were converted to 120, "1 month" to 30, "100+" to 100, "15-20" to 17.5, "21 days" to 21, "2 weeks" to 10 days, "all" to 365
			Frequency	Percent	Valid Percent	Cumulative Percent		* To make standard with other absenteeism measures, numbers between 30 and 365 were divided by (365/240) to arrive at a standard work year.
	Valid	0	236	7.4	15.9	15.9
		0	1	0	0.1	16
		0	1	0	0.1	16.1
		0	2	0.1	0.1	16.2
		0	2	0.1	0.1	16.3
		1	35	1.1	2.4	18.7
		2	87	2.7	5.9	24.6
		3	104	3.3	7	31.6
		4	83	2.6	5.6	37.2
		5	94	3	6.3	43.6
		6	139	4.4	9.4	52.9
		7	10	0.3	0.7	53.6
		8	20	0.6	1.4	55
		9	6	0.2	0.4	55.4
		10	63	2	4.3	59.6
		11	4	0.1	0.3	59.9
		12	55	1.7	3.7	63.6
		13	2	0.1	0.1	63.7
		14	20	0.6	1.4	65.1
		15	66	2.1	4.5	69.5
		16	4	0.1	0.3	69.8
		17	4	0.1	0.3	70.1
		18	13	0.4	0.9	71
		19.73	51	1.6	3.4	74.4
		20	65	2	4.4	78.8
		21	3	0.1	0.2	79
		21.04	2	0.1	0.1	79.1
		22	1	0	0.1	79.2
		23	4	0.1	0.3	79.5
		23.01	4	0.1	0.3	79.7
		23.67	3	0.1	0.2	79.9
		24	18	0.6	1.2	81.2
		24.99	1	0	0.1	81.2
		25	25	0.8	1.7	82.9
		25.64	1	0	0.1	83
		26	1	0	0.1	83.1
		26.3	14	0.4	0.9	84
		28	5	0.2	0.3	84.3
		29	1	0	0.1	84.4
		29.59	14	0.4	0.9	85.3
		31.56	2	0.1	0.1	85.5
		32.88	10	0.3	0.7	86.2
		34.19	2	0.1	0.1	86.3
		38.79	1	0	0.1	86.4
		39.45	18	0.6	1.2	87.6
		40.11	1	0	0.1	87.6
		40.77	1	0	0.1	87.7
		42.74	1	0	0.1	87.8
		46.03	4	0.1	0.3	88
		49.32	4	0.1	0.3	88.3
		52.6	8	0.3	0.5	88.9
		55.89	2	0.1	0.1	89
		59.18	16	0.5	1.1	90.1
		61.15	1	0	0.1	90.1
		63.12	2	0.1	0.1	90.3
		65.75	11	0.3	0.7	91
		69.04	2	0.1	0.1	91.2
		70.36	1	0	0.1	91.2
		72.33	1	0	0.1	91.3
		73.64	1	0	0.1	91.4
		74.3	1	0	0.1	91.4
		76.93	1	0	0.1	91.5
		78.9	13	0.4	0.9	92.4
		85.48	3	0.1	0.2	92.6
		86.79	1	0	0.1	92.6
		92.05	4	0.1	0.3	92.9
		98.63	15	0.5	1	93.9
		105.21	2	0.1	0.1	94.1
		111.78	2	0.1	0.1	94.2
		115.07	1	0	0.1	94.3
		118.36	5	0.2	0.3	94.6
		120.33	1	0	0.1	94.7
		122.96	1	0	0.1	94.7
		124.93	1	0	0.1	94.8
		128.22	1	0	0.1	94.9
		131.51	8	0.3	0.5	95.4
		134.79	1	0	0.1	95.5
		151.23	1	0	0.1	95.5
		155.84	1	0	0.1	95.6
		157.15	1	0	0.1	95.7
		157.81	2	0.1	0.1	95.8
		164.38	2	0.1	0.1	95.9
		169.64	1	0	0.1	96
		170.3	1	0	0.1	96.1
		170.96	4	0.1	0.3	96.4
		177.53	2	0.1	0.1	96.5
		184.11	1	0	0.1	96.6
		197.26	11	0.3	0.7	97.3
		199.23	1	0	0.1	97.4
		210.41	1	0	0.1	97.4
		216.99	1	0	0.1	97.5
		236.71	1	0	0.1	97.6
		238.68	1	0	0.1	97.6
		240	35	1.1	2.4	100
		Total	1481	44.4	100
	Missing	System	1719	55.6
	Total		3090	100
	presenteeism_240							* Some users entered text responses. Answers such as "&gt;120" were converted to 120, "1 month" to 30, "100+" to 100, "15-20" to 17.5, "21 days" to 21, "2 weeks" to 10 days, "all" to 365
			Frequency	Percent	Valid Percent	Cumulative Percent		* To make standard with other presenteeism measures, numbers between 30 and 365 were divided by (365/240) to arrive at a standard work year.
	Valid	0	125	3.9	9.1	9.1
		0	1	0	0.1	9.1
		0	1	0	0.1	9.2
		0	1	0	0.1	9.3
		1	9	0.3	0.7	9.9
		2	24	0.8	1.7	11.7
		3	33	1	2.4	14.1
		4	32	1	2.3	16.4
		5	80	2.5	5.8	22.2
		6	139	4.4	10.1	32.2
		7	1	0	0.1	32.3
		8	2	0.1	0.1	32.5
		9	1	0	0.1	32.5
		10	49	1.5	3.6	36.1
		11	1	0	0.1	36.2
		12	30	0.9	2.2	38.3
		14	11	0.3	0.8	39.1
		15	40	1.3	2.9	42
		18	2	0.1	0.1	42.2
		19.73	117	3.7	8.5	50.7
		20	92	2.9	6.7	57.3
		21	2	0.1	0.1	57.5
		21.04	1	0	0.1	57.5
		21.7	1	0	0.1	57.6
		22	1	0	0.1	57.7
		22.36	2	0.1	0.1	57.8
		23.01	7	0.2	0.5	58.3
		23.67	6	0.2	0.4	58.8
		24	9	0.3	0.7	59.4
		24.33	1	0	0.1	59.5
		25	26	0.8	1.9	61.4
		26	2	0.1	0.1	61.5
		26.3	20	0.6	1.4	63
		29.59	14	0.4	1	64
		31.56	6	0.2	0.4	64.4
		32.88	56	1.8	4.1	68.5
		34.19	3	0.1	0.2	68.7
		36.82	1	0	0.1	68.8
		38.79	1	0	0.1	68.8
		39.45	60	1.9	4.3	73.2
		40.77	1	0	0.1	73.3
		42.74	2	0.1	0.1	73.4
		43.4	2	0.1	0.1	73.6
		46.03	5	0.2	0.4	73.9
		47.34	1	0	0.1	74
		49.32	4	0.1	0.3	74.3
		51.95	1	0	0.1	74.3
		52.6	10	0.3	0.7	75.1
		55.23	1	0	0.1	75.1
		55.89	1	0	0.1	75.2
		59.18	19	0.6	1.4	76.6
		65.75	79	2.5	5.7	82.3
		78.9	28	0.9	2	84.3
		82.19	1	0	0.1	84.4
		85.48	4	0.1	0.3	84.7
		90.74	1	0	0.1	84.8
		94.68	3	0.1	0.2	85
		96.66	1	0	0.1	85.1
		98.63	29	0.9	2.1	87.2
		102.58	1	0	0.1	87.2
		105.21	4	0.1	0.3	87.5
		108.49	1	0	0.1	87.6
		112.44	1	0	0.1	87.7
		118.36	20	0.6	1.4	89.1
		121.64	1	0	0.1	89.2
		124.93	1	0	0.1	89.3
		131.51	50	1.6	3.6	92.9
		144.66	5	0.2	0.4	93.3
		157.81	4	0.1	0.3	93.6
		164.38	19	0.6	1.4	94.9
		168.99	1	0	0.1	95
		170.96	2	0.1	0.1	95.1
		177.53	2	0.1	0.1	95.3
		188.05	1	0	0.1	95.4
		197.26	21	0.7	1.5	96.9
		200.55	1	0	0.1	97
		210.41	1	0	0.1	97
		220.27	2	0.1	0.1	97.2
		220.93	1	0	0.1	97.2
		230.14	4	0.1	0.3	97.5
		233.42	1	0	0.1	97.6
		234.08	1	0	0.1	97.7
		236.71	3	0.1	0.2	97.9
		240	29	0.9	2.1	100
		Total	1380	41.1	100
	Missing	System	1820	58.9
	Total		3090	100
	Discussion
	Q. 37: Does your Lyme disease now require you to use special equipment, such as a cane, a wheel chair, a special bed, or a special telephone? Include occasional use or use in certain circumstances.
			Frequency	Percent	Answered Percent	Cumulative Percent
	Answered	Yes	660	21.4	22.8	22.8
		No	2190	70.9	75.6	98.4
		I don't know	46	1.5	1.6	100
		Total	2896	93.7	100
	Did not answer		194	6.3
	Total		3090	100
	Q. 38, part 2: If so, please select the special equipment that you use. [Choose all that apply. Include any equipment you did not need before you contracted Lyme disease.]
			Frequency	Percent	Answered Percent	Cumulative Percent
	Answered	Cane	422	13.7	100	100
	Did not answer		2668	86.3
	Total		3090	100
	Q 38, part 3: If so, please select the special equipment that you use. [Choose all that apply. Include any equipment you did not need before you contracted Lyme disease.]
			Frequency	Percent	Answered Percent	Cumulative Percent
	Answered	Wheel chair	210	6.8	100	100
	Did not answer		2880	93.2
	Total		3090	100
[truncated: 59 more columns]
